# Supplementary material for: Anchoring ultra-small Mo2C nanocrystals on honeycomb-structured N-doped carbon spheres for efficient hydrogen evolution
Source: Royal Society of Chemistry journal article supplement (doi:10.1039/d2cc01205g), 2022-01-01
Supplement: d2cc01205g1.pdf [file d2cc01205g1.pdf]

# 1 Supporting information

## 2 Anchoring Ultra-Small Mo<sub>2</sub>C Nanocrystals on Honeycomb-Structured N- 3 doped Carbon Spheres for Efficient Hydrogen Evolution

4 *Changwei Shi*<sup>a</sup>, *Xiaotong Li*<sup>a</sup>, *Wei Yang*<sup>a</sup>, *Xiong Liu*<sup>a</sup>, *Yongkang An*<sup>a</sup>, *Liang Zhou*<sup>a</sup>, and  
5 *Liqiang Mai*<sup>\*a, b</sup>

6 a. State Key Laboratory of Advanced Technology for Materials Synthesis and Processing,  
7 Wuhan University of Technology, Wuhan 430070, P. R. China

8 b. Foshan Xianhu Laboratory of the Advanced Energy Science and Technology Guangdong  
9 Laboratory, Xianhu hydrogen Valley, Foshan 528200, P. R. China

10 \*E-mail: mlq518@whut.edu.cn

11

### 12 1. Experimental methods

#### 13 Materials.

14 All chemicals were of reagent grade and used without further purifications. Tetraethyl  
15 orthosilicate (C<sub>8</sub>H<sub>20</sub>O<sub>4</sub>Si), Resorcinol (C<sub>6</sub>H<sub>6</sub>O<sub>2</sub>), were purchased from Shanghai Aladdin Bio-  
16 Chem Technology Co., LTD. Ammonia hydroxide (NH<sub>3</sub>·H<sub>2</sub>O), Ammonium molybdate  
17 tetrahydrate (NH<sub>4</sub>)<sub>6</sub>Mo<sub>7</sub>O<sub>24</sub>·4H<sub>2</sub>O, C<sub>2</sub>H<sub>5</sub>OH, CH<sub>2</sub>O, HF were purchased from Sinopharm  
18 Chemical Reagent Co., LTD.

#### 19 Synthesis of silica nanospheres.

20 In a typical synthesis of the silica spheres, 2 mL of Tetraethyl orthosilicate and 3 mL of  
21 aqueous ammonia solution (32 wt.%) was added to 50 mL of ethanol and stirred for 24 h at 25 °C.  
22 The obtained white solid product was collected by centrifugation, washed with water and ethanol,  
23 and then air-dried at 70 °C for 10 h.

#### 24 **Synthesis of Mo-silica-RF precursor.**

25 Firstly, 0.4 g of silica nanospheres were dispersed into 50 mL of deionized (DI) water under  
26 supersonic ultrasound for 10 minutes. Then, 0.4 g of resorcinol was added into the above solution  
27 under magnetic stirring for 10 mins. After that, 0.8 g of ammonium molybdate tetrahydrate was  
28 added under stirring for 10 minutes. Next, 0.56 mL of formaldehyde (36 wt.%) was added and  
29 stirred at room temperature (RT) for 30 minutes. After that, the mixture solution was added in a  
30 PTFE hydrothermal reactor and treated at 100 °C for 24 h. Finally, the Mo-silica-RF precursor  
31 was collected by centrifugation, washed with water and ethanol, and dried at 70 °C for 10 h.

#### 32 **Synthesis of Mo<sub>2</sub>C-HNCS.**

33 Firstly, the Mo-silica-RF precursor was heated at 1100 °C for 2 hours in the Argon  
34 atmosphere (with a heating rate of 10 °C/min). Subsequently, the silica spheres in the carbonized  
35 product were removed by etching for 24 h in hydrofluoric acid (15 wt. %) solution. After that, the  
36 product was further heated at 800 °C for 1 hours with Argon gas flowing through the 2 M KOH  
37 solution. After the KOH activation process, the Mo<sub>2</sub>C-HNCS were obtained.

#### 38 **Synthesis of Mo<sub>2</sub>C-CS.**

39 Firstly, the Mo-RF precursor was synthesized under the identical condition as the above-  
40 mentioned Mo-silica-RF precursor but without silica as a hard template. The Mo<sub>2</sub>C-CS was  
41 obtained after calcination of the Mo-RF precursor at 1100 °C for 2 hours in Argon atmosphere  
42 (with a heating rate of 10 °C/min).

43

## 44 **2. Characterization.**

45 Powder X-ray diffraction (XRD) measurements were performed on a Bruker D8 Discover X-  
46 ray diffractometer equipped with a Co K $\alpha$  X-ray source ( $\lambda = 1.5406 \text{ \AA}$ ). TGA was carried out on  
47 a NETZSCH STA 449F5 with a temperature ramp of  $10 \text{ }^\circ\text{C min}^{-1}$  under an air atmosphere. X-ray  
48 photoelectron spectroscopy (XPS) analysis was performed using an ASAP 2020. Raman spectra  
49 with a 514.5 nm laser Raman microscope by Renishaw INVIA. Field-emission scanning electron  
50 microscopy (FESEM) images were recorded using a JEOL-7100F microscope. TEM, HRTEM,  
51 and HAADF-STEM images were recorded using a STEM/EDS microscope with JEOL JEM-  
52 2100F working at 200 kV.

## 53 **3. Electrochemical Measurements.**

54 To prepare the catalyst ink, 7 mg of the catalyst powder and 3 mg of XC-72R carbon were  
55 dispersed in a mixture of 750  $\mu\text{L}$  of isopropanol, 200  $\mu\text{L}$  of water, 50  $\mu\text{L}$  of 5 wt.% Nafion solution  
56 at room temperature under ultrasonic stirring for 30 min. Then, 14  $\mu\text{L}$  of the catalyst ink was  
57 dropped on a glassy carbon electrode with a diameter of 5 mm and dried at room temperature for  
58 1 h (catalyst loading  $\sim 0.5 \text{ mg cm}^{-2}$ ).

59 All the electrochemical measurements were carried out in a standard three-electrode cell  
60 using the CHI760E workstations at room temperature. Hg/HgO electrode and graphite rod were  
61 used as reference and counter electrodes, respectively. The reference electrode was corrected with  
62 a reversible hydrogen electrode (RHE). The electrochemical experiments were carried out in 1 M  
63 KOH electrolyte. Tafel plots were carried out at a scan rate of  $5 \text{ mV s}^{-1}$ . Electrochemical  
64 impedance spectroscopy (EIS) was measured with a voltage of  $-0.128 \text{ V}$  versus RHE from 100  
65 kHz to 0.05 Hz with an AC voltage of 5 mV.

66 With the measurements of performing in a Windows of  $-0.24$  and  $0.76$  V versus RHE, we  
67 applied scan rates ranging from  $20$  to  $180$   $\text{mV s}^{-1}$  to build a plot of the charging from current  
68 density against the scan rate at a fixed potential of  $0.17$  V. The electrochemically active area  
69 (ECSA) was estimated according to the slope of the obtained linear curve. Long-term stability tests  
70 were conducted by two different evaluation methods were adopted to assess the. The amperometric  
71 (i-t) stability was carried out in  $\eta = 128$  mV. Additionally, the accelerated linear potential sweeps  
72 (LSV) are conducted repeatedly on the working electrodes between  $-0.33$  and  $0.07$  V at  $50$   $\text{mV}$   
73  $\text{s}^{-1}$ .  
74

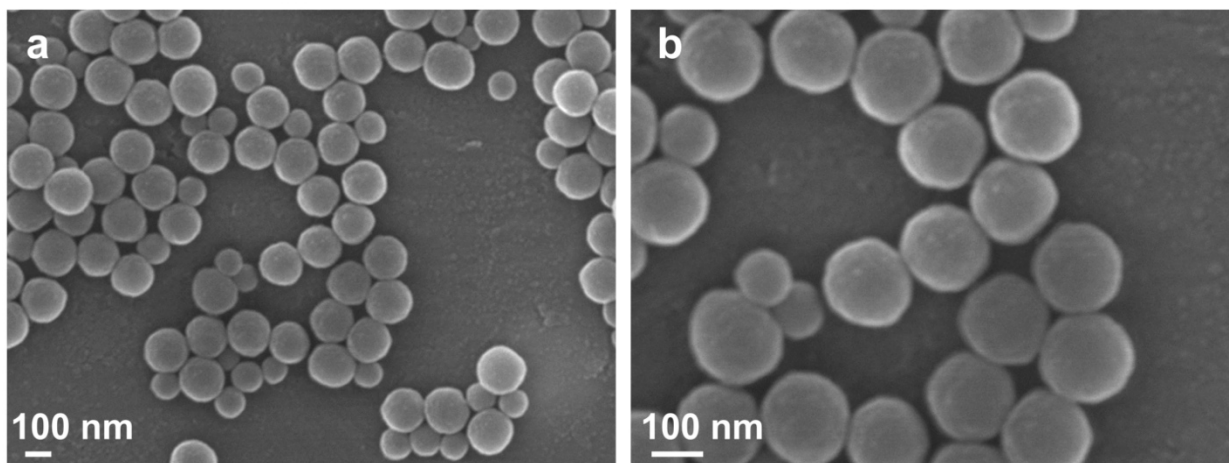

75

76 **Fig. S1** (a, b) SEM images of silica spheres.

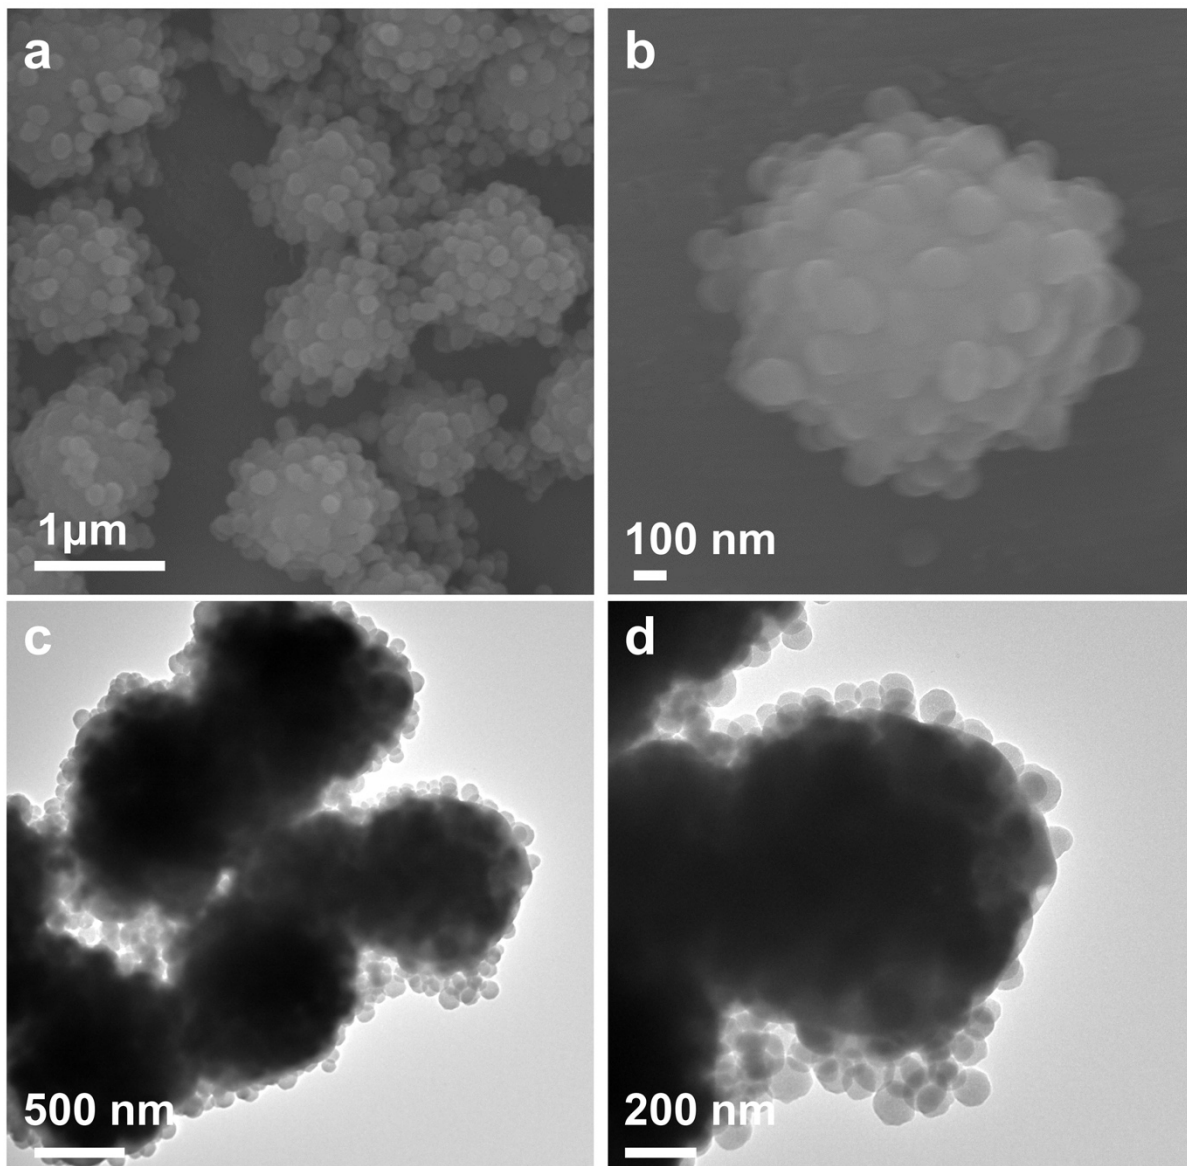

77

78 **Fig. S2** (a, b) SEM images; (c, d) TEM images of Mo-silica-RF.

79

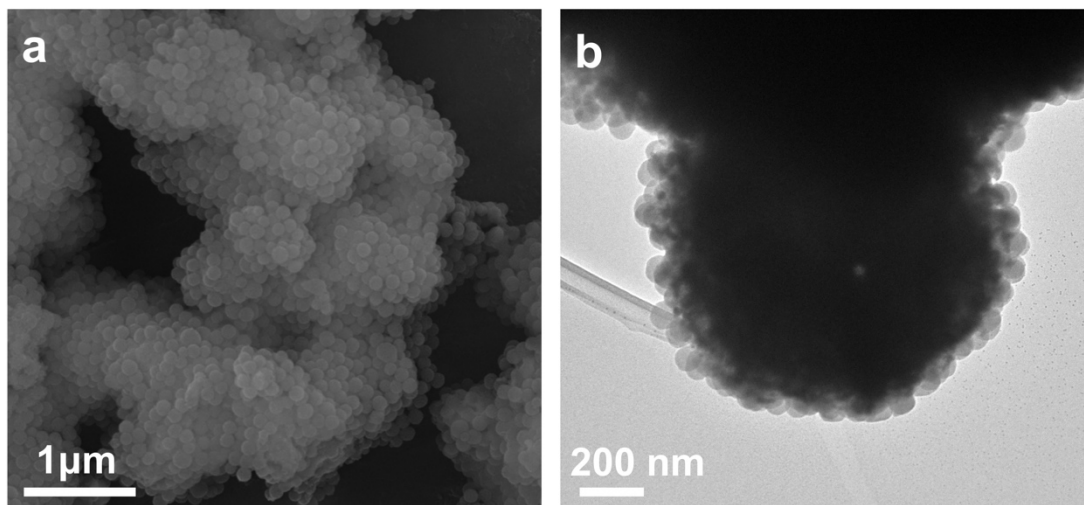

80

81 **Fig. S3** (a) SEM image, (b) TEM image of Mo<sub>2</sub>C-silica-CS.

82

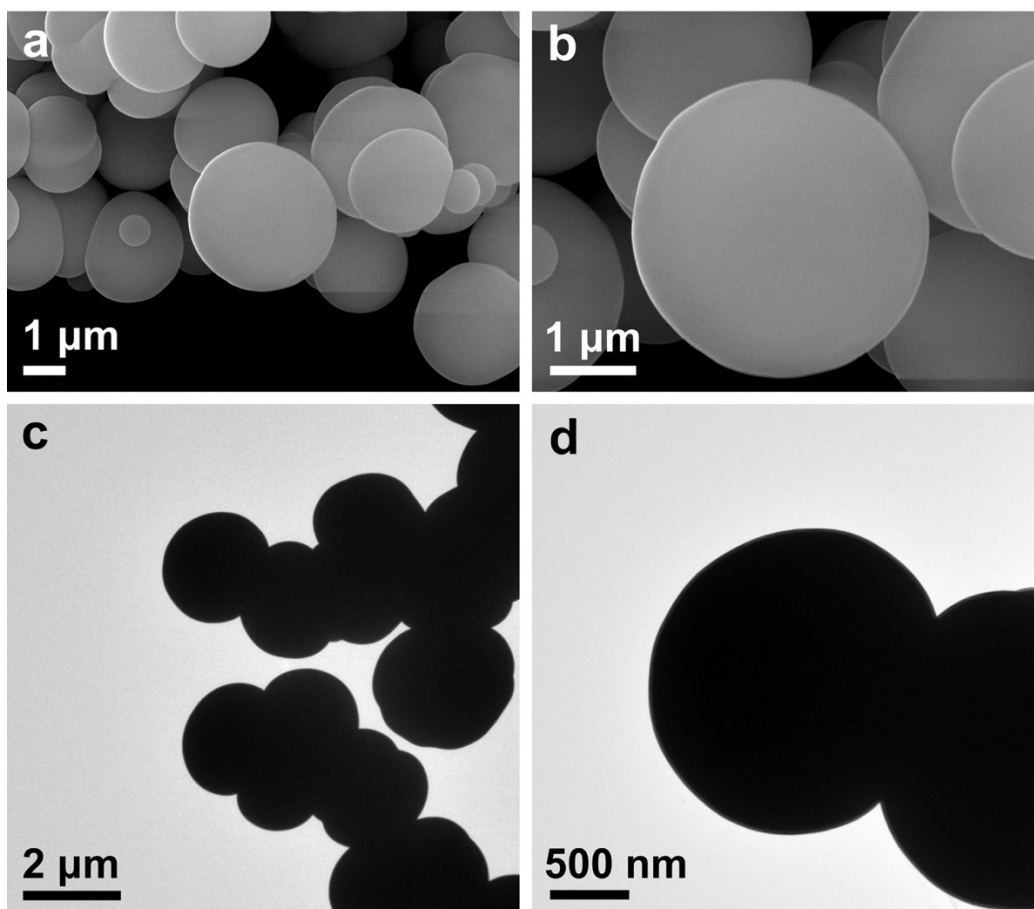

83

84 **Fig. S4** (a, b) SEM images; (c, d) TEM images of Mo<sub>2</sub>C-CS.

85



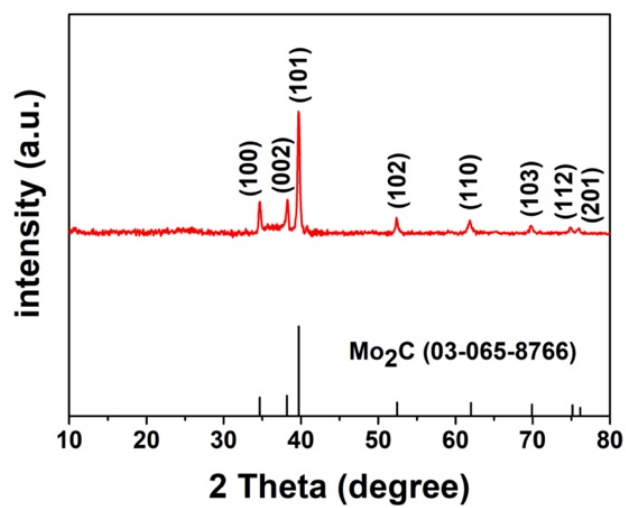

86

87 **Fig. S5** XRD pattern of Mo<sub>2</sub>C-CS.

88

89

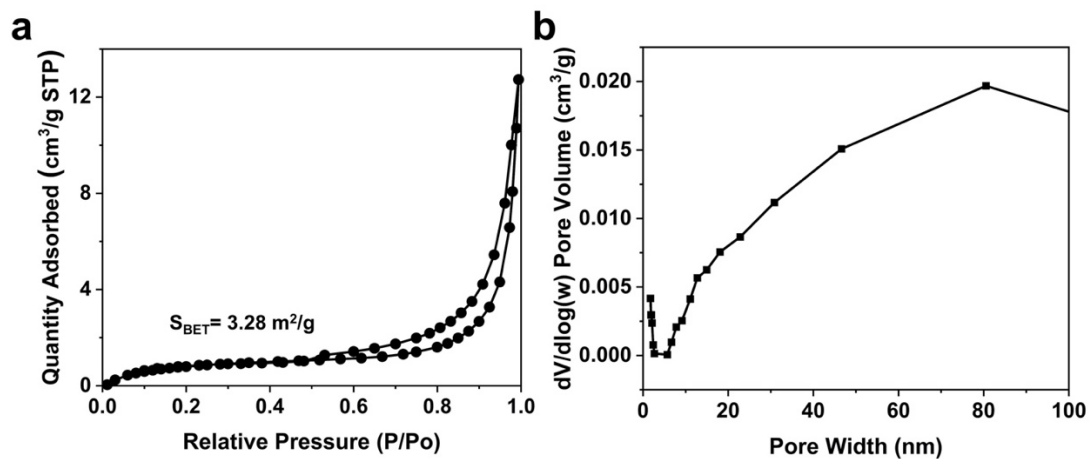

90

91 **Fig. S6** (a) N<sub>2</sub> adsorption/desorption isotherms curve; (b) pore size distribution of Mo<sub>2</sub>C-CS

92

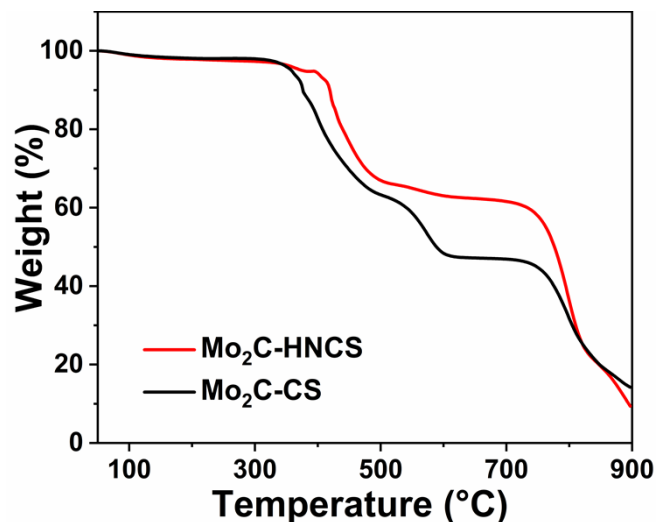

93

94 **Fig. S7** TGA curves of Mo<sub>2</sub>C-HNCS and Mo<sub>2</sub>C-CS.

95 TGA of Mo<sub>2</sub>C-HNCS and Mo<sub>2</sub>C-CS catalysts was tested under air atmosphere from room  
 96 temperature to 900 °C. It's assumed that there is no residual of carbon under 900 °C, the residual  
 97 mass should be the content of MoO<sub>3</sub>. Accordingly, the Mo<sub>2</sub>C content was calculated from the  
 98 following equation:

$$99 \quad \text{Mass\% (Mo}_2\text{C)} = \frac{\text{residual mass}}{2 \times M(\text{MoO}_3)} \times \frac{M(\text{Mo}_2\text{C})}{\text{Mass}_{\text{Original}}} = \frac{\text{residual mass (\%)}}{2 \times M(\text{MoO}_3)} \times M(\text{Mo}_2\text{C})$$

100 Where M represents the molar weight.

101 residual mass (%) of Mo<sub>2</sub>C-HNCS= 8.87%; residual mass (%) of Mo<sub>2</sub>C-CS=14.06%;

102 Mass% (Mo<sub>2</sub>C) of Mo<sub>2</sub>C-HNCS= 6.28%;

103 Mass% (Mo<sub>2</sub>C) of Mo<sub>2</sub>C-CS=9.96%.

104

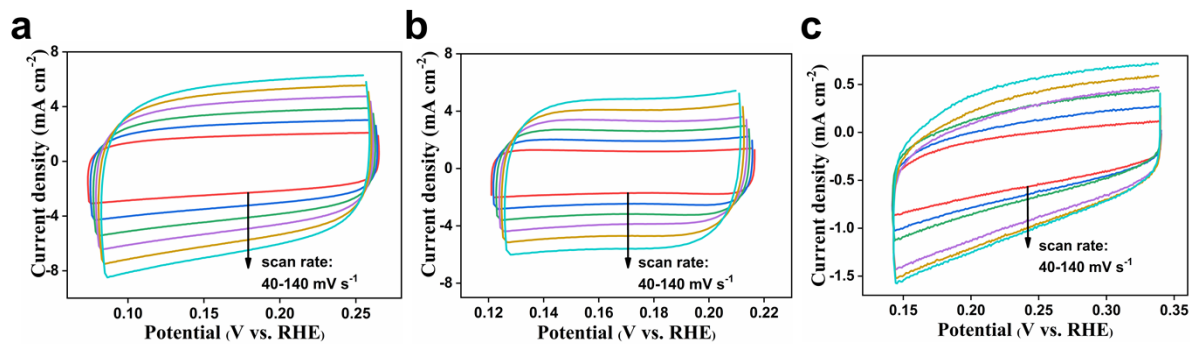

105  
106

107 **Fig. S8** CV curves of Mo<sub>2</sub>C-HNCS, 20 wt.% Pt/C, and Mo<sub>2</sub>C-CS at scan rates from 40 to 140 mV  
108 s<sup>-1</sup> in 1M KOH.

109

110

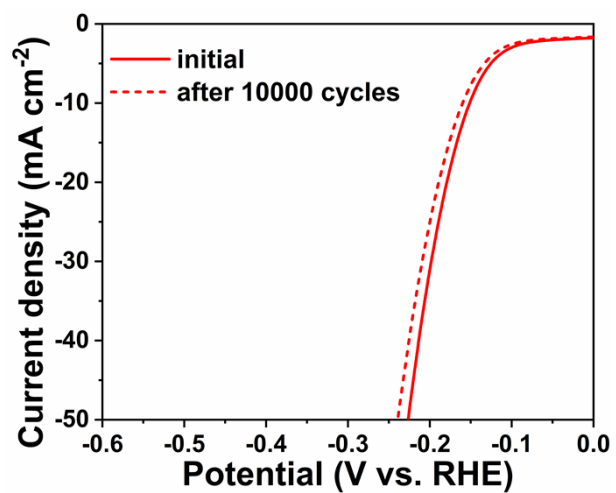

111

112 **Fig. S9** Polarization curve for Mo<sub>2</sub>C-HNCS before and after 10000 cycles. The accelerated linear  
113 potential sweeps (LSV) were conducted repeatedly between -0.33 and 0.07 V at 50 mV s<sup>-1</sup>.

114
